# Supplementary material
Source: publisher figshare collection journal article supplement (https://aacr.figshare.com/articles/dataset/_/23905268)

**Supplemental Figure 9. Impact of additional chromosome 1 structural events on outcome**

**A.** Effect of amp(1q) with or without a total (TT) gain on PFS **B.** Effect of amp(1q) on OS

**A.**

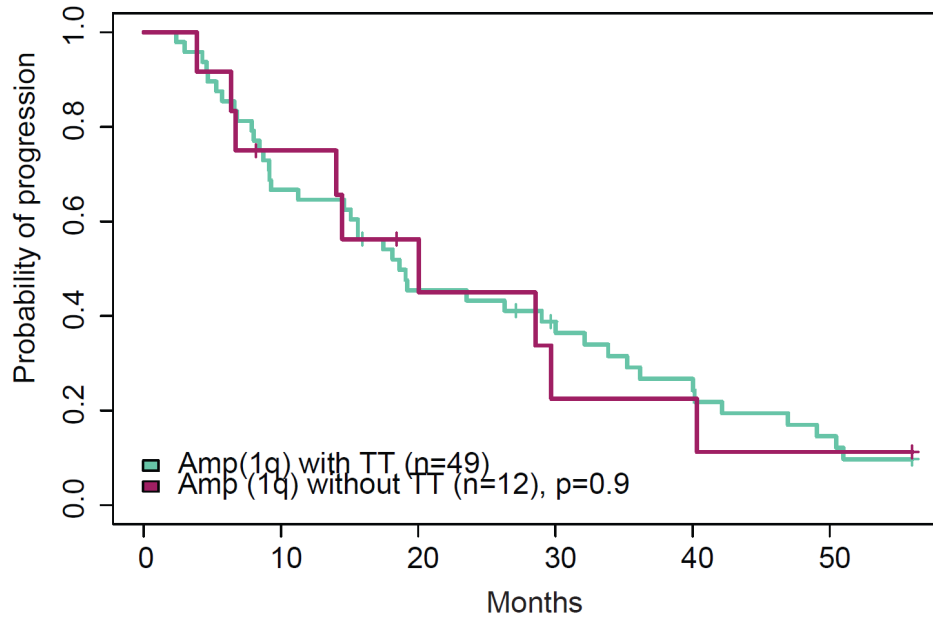

**B.**

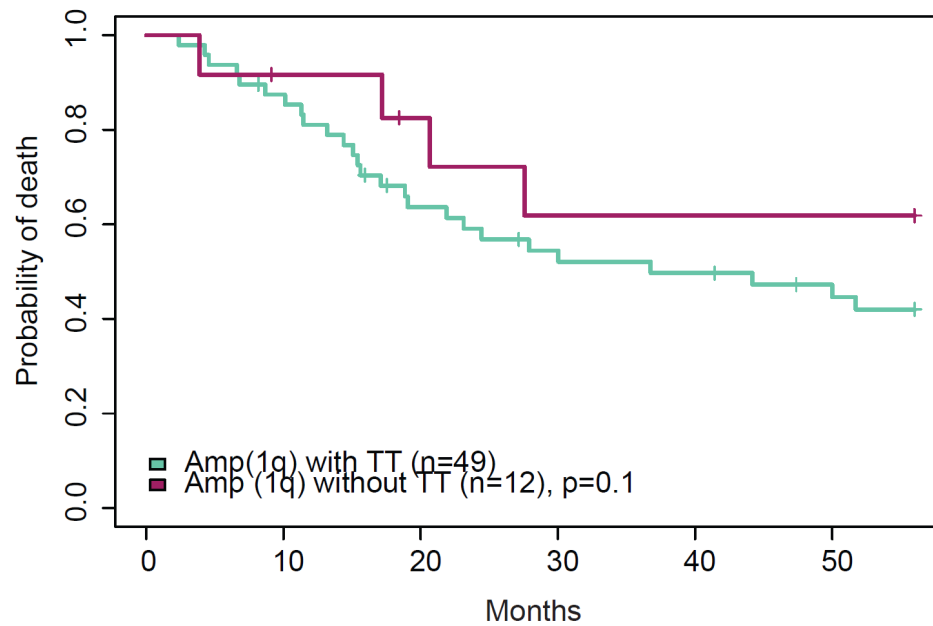

Supplement: Supplementary file 1 [file 41911451]
